# Supplementary material for: Taste Evaluation of Yellowtail (Seriola Quinqueradiata) Ordinary and Dark Muscle by Metabolic Profiling
Source: Molecules. 2019 Jul 15;24(14):2574. doi: 10.3390/molecules24142574 (PMC6680873; doi:10.3390/molecules24142574)
Supplement: Supplementary file 1 [file molecules-24-02574-s001.zip › Supplementary Table.xlsx]

## Sheet: Table S1
Table S List of taste attributes and metabolites
	Taste attributes and metabolites	muscle type		Dark muscle															Ordinary muscle
		Storage condition		Control (before storage)			0 °C						5 °C						Control (before storage)			0 °C						5 °C
							3 day			14 day			1 day			7 day						3 day			14 day			1 day			7 day
			Sample ID	D-C			D-0°C3d			D-0°C14d			D-5°C1d			D-5°C7d			O-C			O-0°C3d			O-0°C14d			O-5°C1d			O-5°C7d
		Variable ID
y variables	Sourness	a		-34.8533	±	0.789958	-31.7433	±	1.37122	-32.2667	±	1.94582	-31.1733	±	1.2822	-34.47	±	1.61948	-31.62	±	0.880682	-31.36	±	1.1153	-31.6867	±	1.09441	-31.48	±	1.06902	-31.5533	±	1.16899
	Acidic bitterness	b		4.61	±	0.950158	3.98333	±	0.642365	4.42	±	0.739932	3.93333	±	1.06651	5.04	±	0.809506	4.74667	±	0.902238	7.78	±	7.29625	11.83	±	6.63145	5.6	±	1.54787	5.07667	±	2.03643
	Irritant	c		-0.876667	±	0.106927	-0.803333	±	0.145717	-0.423333	±	0.270617	-0.85	±	0.32078	-0.626667	±	0.177858	-1.14	±	0.323574	-0.98	±	0.147309	-1.04	±	0.192873	-1.2	±	0.291033	-1.18333	±	0.215019
	Umami	d		10.1567	±	0.452806	9.36	±	0.567891	9.47	±	0.638514	9.22	±	0.494267	9.96667	±	0.489524	12.14	±	0.41328	12.0667	±	0.406735	12.2433	±	0.292973	12.1533	±	0.364737	12.37	±	0.493254
	Saltness	e		-15.7	±	0.615549	-15.6267	±	0.398288	-15.6567	±	0.658508	-15.99	±	0.650231	-15.7733	±	0.515978	-17.2533	±	0.646942	-16.84	±	0.686367	-16.9967	±	0.590282	-17.18	±	0.721318	-17.1033	±	0.454899
	Bitterness	f		-0.376667	±	0.011547	-0.29	±	0.0264575	-0.343333	±	0.0321455	-0.353333	±	0.0503322	-0.306667	±	0.080829	-0.3	±	0.0264575	0.243333	±	1.10591	1.44667	±	2.162	-0.216667	±	0.125831	-0.243333	±	0.228546
	Astringency	g		-0.353333	±	0.085049	-0.356667	±	0.0550757	-0.243333	±	0.0585947	-0.4	±	0.034641	-0.296667	±	0.0665833	-0.376667	±	0.0321455	-0.353333	±	0.0723418	-0.34	±	0.04	-0.373333	±	0.0550757	-0.386667	±	0.0351188
	Richness	h		1.84667	±	0.115036	1.88667	±	0.100664	1.87333	±	0.090185	1.77667	±	0.145717	1.72667	±	0.0950438	2.83667	±	0.721272	2.86	±	0.687895	2.84333	±	0.669054	2.76333	±	0.673968	2.75	±	0.836242
x variables	1,6-Anhydroglucose-3TMS	1								0.00579023	±	0.00286905
	2-Aminoethanol-2TMS	2					0.0631083	±	0.0054096	0.102507	±	0.0233061	0.043795	±	0.0113412
	2-Hydroxyisobutyric acid-2TMS	3																	0.036868	±	0.00993614	0.0504609	±	0.0126452	0.0450259	±	0.00760618
	5-Oxoproline-2TMS	4		0.0442294	±	0.0104751	0.0454088	±	0.00728779	0.0590063	±	0.0165694	0.0418373	±	0.00267359	0.0790653	±	0.0129441	0.0724767	±	0.017463	0.0559257	±	0.0223106	0.0620296	±	0.0282315	0.040947	±	0.00252803	0.0601427	±	0.043978
	Aconitic acid-3TMS	5											0.0199856	±	0.00370844
	Alanine-2TMS	6		0.804109	±	0.0893725	1.1867	±	0.117105	1.23654	±	0.202164	0.638059	±	0.0612603	1.27616	±	0.0233787	0.409806	±	0.101005	0.532863	±	0.093769	0.4289	±	0.254454	0.0495234	±	0.00497227	0.458565	±	0.0964499
	Arabinose-4TMS(2)	7																							0.0411422	±	0.0143849				0.0786985	±	0.027239
	Arabinose-meto-4TMS	8																				0.0298501	±	0.00825938	0.140627	±	0.0246609	0.00870897	±	0.00234884	0.121318	±	0.0345614
	Ascorbic acid-4TMS	9																	0.395547	±	0.112142	0.362583	±	0.0379236				0.566811	±	0.024548
	Asparagine-3TMS	10																										0.0701825	±	0.00905699
	Creatinine-3TMS	11		0.705094	±	0.470282	1.19856	±	0.152462	1.14575	±	0.164712	1.27926	±	0.060081	1.02293	±	0.124265	3.66414	±	0.495808	4.93982	±	0.408498	4.1335	±	0.959186	3.43538	±	0.102393	4.54118	±	0.631767
	Fructose 1-phosphate-meto-6TMS(1)	12		0.550256	±	0.15127	0.0471536	±	0.0145212				0.0968409	±	0.0156822							0.0303342	±	0.0100374
	Fructose 1-phosphate-meto-6TMS(2)	13		0.55064	±	0.151681	0.0471536	±	0.0145212				0.0968409	±	0.0156822							0.0303342	±	0.0100374	0.0244813	±	0.0162899
	Fructose-meto-5TMS(1)	14		0.0398401	±	0.00243434							0.0616863	±	0.0154234	0.120821	±	0.0328924													0.0359376	±	0.0066309
	Fructose-meto-5TMS(2)	15		0.0834137	±	0.0031667							0.0879214	±	0.0495625				0.0810531	±	0.0246826	0.0929847	±	0.0414241	0.0855115	±	0.0148826				0.0843024	±	0.0482835
	Fucose-4TMS(1)	16																													0.170277	±	0.131118
	Fumaric acid-2TMS	17		0.0678227	±	0.00565279													0.0313258	±	0.0113204							0.0166011	±	0.0026055
	Galactose-meto-5TMS(1)	18		2.78056	±	0.0393209	22.0445	±	3.97331	30.4779	±	5.43282	7.91796	±	0.981552	14.6732	±	6.06957	2.75832	±	0.533106	3.37795	±	1.71762	2.9101	±	1.3403	2.07403	±	0.875563	2.99628	±	2.2128
	Galactose-meto-5TMS(2)	19					3.95264	±	1.75996	6.47574	±	0.695499				5.02845	±	1.56863
	Galacturonic acid-5TMS(1)	20											0.0552406	±	0.0205323				0.0889764	±	0.0221723	0.112707	±	0.0742307	0.0864044	±	0.0531245	0.0777503	±	0.0195214
	Galacturonic acid-5TMS(2)	21											0.0271712	±	0.00268599													0.015394	±	0.00451287
	Gluconic acid-6TMS	22														1.04273	±	1.50416							0.407024	±	0.419793				0.459556	±	0.168538
	Glucose 6-phosphate-meto-6TMS(1)	23		0.174822	±	0.047885							0.0442349	±	0.00930006
	Glucose-5TMS(1)	24																	0.509149	±	0.144037	0.668847	±	0.439515	0.590666	±	0.289339	0.45992	±	0.129213
	Glucose-5TMS(2)	25																										0.508491	±	0.143324
	Glucose-meto-5TMS(1)	26																	2.75832	±	0.533106	3.37795	±	1.71762	2.9101	±	1.3403	2.07403	±	0.875563	2.98308	±	2.2326
	Glucose-meto-5TMS(2)	27					3.7043	±	1.34081	4.81498	±	0.753044				2.44922	±	0.678432
	Glucuronic acid-5TMS(1)	28																	0.0889764	±	0.0221723	0.112707	±	0.0742307	0.0864044	±	0.0531245
	Glucuronic acid-5TMS(2)	29																							0.158923	±	0.163721	0.015394	±	0.00451287	0.181571	±	0.0727395
	Glutamine-3TMS	30																										0.0441108	±	0.00750873
	Glyceric acid-3TMS	31								0.0911457	±	0.0352552	0.0190494	±	0.00626663										0.087753	±	0.0431124				0.126535	±	0.0951528
	Glycerol 3-phosphate-4TMS	32		0.51494	±	0.0221019	0.331903	±	0.0680382	0.323448	±	0.0726232	0.40618	±	0.0624842	0.367801	±	0.114408	0.295491	±	0.0960682	0.088302	±	0.0381866	0.053724	±	0.0409328	0.282104	±	0.0485963	0.0373505	±	0.0205784
	Glycerol-3TMS	33					1.62808	±	0.248223	2.31006	±	0.677186	1.17478	±	0.0617877	2.46993	±	0.34454
	Glycine-2TMS	34					0.0448497	±	0.0185627	0.0569005	±	0.0282332	0.0306234	±	0.01755				0.064449	±	0.0608916	0.0624173	±	0.038326	0.0404113	±	0.0369664
	Glycine-3TMS	35		0.913546	±	0.303959	1.07386	±	0.445111	1.11996	±	0.431292	0.89976	±	0.227946	1.36366	±	0.346002	0.706096	±	0.120345	0.725968	±	0.171285	0.84873	±	0.2005	0.894562	±	0.211167	0.853533	±	0.18908
	Guanosine-5TMS	36											0.0279671	±	0.00279003
	Histidine-3TMS	37		0.405971	±	0.115001	0.52837	±	0.191705	0.467864	±	0.171007	0.336692	±	0.16482	0.384436	±	0.110174	2.99626	±	0.117493	4.08236	±	0.381781	3.7364	±	0.288454	0.753114	±	0.152758	3.6726	±	0.702665
	Hypotaurine-3TMS	38											0.030554	±	0.0039356
	Hypoxanthine-2TMS	39					0.53719	±	0.175497	0.796609	±	0.175937	0.392748	±	0.0172261	1.25631	±	0.140148	0.158202	±	0.0862242	0.253171	±	0.200103	0.39822	±	0.163575	0.20999	±	0.0461332	0.706596	±	0.147878
	Inosine monophosphate-5TMS	40		0.783349	±	0.358712																						2.55714	±	0.811868
	Inosine-4TMS	41					5.20859	±	0.214611				3.40909	±	0.222251				0.51319	±	0.564736	1.16379	±	0.0473138	2.66867	±	0.485733	1.22571	±	0.0474874	2.97126	±	0.733128
	Inositol-6TMS(2)	42		0.16316	±	0.0266901	0.18464	±	0.00442926	0.184399	±	0.0201151	0.189955	±	0.0357144	0.250748	±	0.0125108	0.117301	±	0.0243274	0.157933	±	0.018716	0.160861	±	0.0424608	0.167636	±	0.0211698	0.193664	±	0.0434049
	Isoleucine-2TMS	43					0.0474537	±	0.00459984	0.0757131	±	0.0164194	0.0321769	±	0.0016389	0.120446	±	0.0357761				0.0297082	±	0.00778422	0.0241671	±	0.00789397	0.0328274	±	0.000911217
	Lactic acid-2TMS	44		3.68286	±	0.99027	7.19078	±	1.13525	6.12123	±	1.34629	1.8103	±	0.0699766	3.5536	±	1.23018	12.3116	±	2.38903	15.2305	±	1.4146	10.618	±	4.4313	1.1899	±	0.0601841	10.396	±	1.71957
	Lactitol-9TMS	45					0.540025	±	0.220014	0.748266	±	0.309531	0.30556	±	0.0370651	1.06876	±	0.540562
	Leucine-2TMS	46																	0.0240599	±	0.00332829				0.0399501	±	0.0101397
	Lysine-4TMS	47		0.460264	±	0.01035				0.82534	±	0.0530382	0.63836	±	0.0775788	1.13046	±	0.186132										2.98141	±	0.591399
	Malic acid-3TMS	48		0.225573	±	0.0101388							0.0235343	±	0.00393888				0.145182	±	0.0469388	0.0572058	±	0.0197191				0.0752418	±	0.00627063
	Maltose-meto-8TMS(1)	49					2.46028	±	0.57272	2.72746	±	1.31164	1.4781	±	0.162835	2.0509	±	1.17708										0.0730758	±	0.0850201
	Maltose-meto-8TMS(2)	50					0.540025	±	0.220014	0.748266	±	0.309531	0.30556	±	0.0370651	1.06876	±	0.540562
	Mannose-meto-5TMS(1)	51		2.78056	±	0.0393209													2.75832	±	0.533106	3.37795	±	1.71762	2.9101	±	1.3403				2.99628	±	2.2128
	Mannose-meto-5TMS(2)	52																	2.75832	±	0.533106	3.37795	±	1.71762	2.9101	±	1.3403	2.07403	±	0.875563	2.98308	±	2.2326
	Methionine-2TMS	53					0.0390608	±	0.00668607				0.0296469	±	0.000835966													0.0192101	±	0.00277997
	N-Acetylaspartic acid-2TMS	54																										0.0699229	±	0.00836941
	N-Acetylmannosamine-meto-4TMS	55		0.0657976	±	0.0121929	0.0754882	±	0.000745393	0.0744883	±	0.0072084	0.0822491	±	0.0150429	0.102179	±	0.00810483	0.0429395	±	0.0143914	0.052139	±	0.0179081	0.0629389	±	0.024146	0.0718658	±	0.0082436	0.0655288	±	0.0295546
	Niacinamide-TMS	56		0.170035	±	0.00414573	0.525989	±	0.123573	0.577956	±	0.129967	0.389998	±	0.00892883	0.636322	±	0.0898857	0.327269	±	0.151503	0.576571	±	0.100868	0.656208	±	0.127607	0.453284	±	0.0279945	0.66687	±	0.151737
	Ornithine-3TMS	57																										0.0277297	±	0.00971431
	Ornithine-4TMS	58					0.195556	±	0.0611222	0.338402	±	0.114792	0.113095	±	0.00992853							0.192981	±	0.0710294				0.494517	±	0.154179
	Palmitic acid-TMS	59					0.0499226	±	0.015168										0.0528605	±	0.00594557	0.0684783	±	0.00873132							0.077136	±	0.0173724
	Pantothenic acid-3TMS	60		0.115363	±	0.0308782	0.131422	±	0.032638	0.136771	±	0.0411128	0.146826	±	0.00935438	0.216838	±	0.0529096							0.0106486	±	0.00124827	0.0204002	±	0.00109035
	Phenylalanine-2TMS	61		0.220629	±	0.0589717	0.648675	±	0.0939651	1.10158	±	0.294829	0.427111	±	0.0430164	1.55162	±	0.531288	0.21724	±	0.0458873	0.297214	±	0.0492009	0.367624	±	0.114548	0.288494	±	0.0112719	0.364833	±	0.129364
	Phosphoric acid-3TMS	62		7.45497	±	1.7509	14.8248	±	2.40309	14.4519	±	1.065	5.52001	±	0.519207	7.37357	±	2.97749	17.9834	±	2.69761	22.9336	±	1.71585	23.1482	±	1.6126	5.18275	±	0.661371	22.6762	±	3.66737
	Proline-2TMS	63														0.0842124	±	0.0228938				0.0192143	±	0.00843891				0.0197744	±	0.00235906
	Putrescine-4TMS	64																				0.241801	±	0.0325827							0.383282	±	0.215357
	Pyruvic acid-meto-TMS	65																	0.110666	±	0.0526813	0.288903	±	0.0445916	0.200089	±	0.0820108				0.141894	±	0.0817846
	Ribose-4TMS(1)	66																							0.0197492	±	0.0049267
	Ribose-4TMS(2)	67																							0.0302866	±	0.0231672				0.0204158	±	0.00955483
	Ribose-4TMS(3)	68																							0.0306048	±	0.00613584
	Ribose-4TMS(4)	69																							0.25515	±	0.0349177				0.192388	±	0.0317222
	Ribose-meto-4TMS(1)	70																							0.0926481	±	0.0118283				0.0795396	±	0.0364179
	Ribose-meto-4TMS(2)	71																							0.140627	±	0.0246609	0.00870897	±	0.00234884	0.109789	±	0.0500961
	Serine-3TMS	72					0.0546894	±	0.026288	0.0757111	±	0.0191836	0.0378989	±	0.00331517	0.10894	±	0.0175225	0.0695658	±	0.009524	0.0747746	±	0.0361656	0.0774799	±	0.0347371	0.063812	±	0.0136611	0.0754227	±	0.0488759
	Sorbose-meto-5TMS(1)	73											0.0668041	±	0.0186129	0.120821	±	0.0328924													0.0359376	±	0.0066309
	Sorbose-meto-5TMS(2)	74		0.04658	±	0.0137603							0.0668041	±	0.0186129	0.0820707	±	0.0389893	0.0810531	±	0.0246826				0.0625423	±	0.00546552				0.0660556	±	0.0284403
	Stearic acid-TMS	75					0.0590416	±	0.0265175	0.0582138	±	0.0238787							0.0961934	±	0.0126997	0.100646	±	0.0194485	0.083332	±	0.0229046				0.107075	±	0.020476
	Succinic acid-2TMS	76		0.304868	±	0.13203	0.129132	±	0.0690306				0.136796	±	0.0184881				0.218729	±	0.121188							0.156692	±	0.103022
	Tagatose-5TMS(5)	77		2.78056	±	0.0393209							6.1364	±	1.58127				2.75832	±	0.533106	3.37795	±	1.71762	2.78787	±	1.53254				2.99628	±	2.2128
	Taurine-3TMS	78		36.1529	±	18.1979	54.0656	±	8.20204	57.8594	±	1.00366	14.8961	±	4.11794	22.7131	±	7.38397
	Threonic acid-4TMS	79											0.0171564	±	0.00192897
	Threonine-3TMS	80		0.134219	±	0.0250083	0.219374	±	0.0320094	0.316894	±	0.0551239	0.193916	±	0.00982246	0.45952	±	0.132073	0.225425	±	0.0493247	0.265878	±	0.0200342	0.273914	±	0.035957	0.290728	±	0.0297356	0.284834	±	0.0172659
	Trehalose-8TMS	81					2.7988	±	1.15851	3.87565	±	1.36962	1.4781	±	0.162835	4.70899	±	2.14914										0.0730758	±	0.0850201
	Tyrosine-3TMS	82											0.0155234	±	0.0022341													0.016443	±	0.00249397
	Uracil-2TMS	83					0.0615077	±	0.011296	0.0767469	±	0.0137611	0.0472128	±	0.00198451	0.106503	±	0.0200409							0.0462748	±	0.00847027	0.0188975	±	0.00246328
	Urea-2TMS	84					1.42911	±	0.383408	1.44717	±	0.375924							1.60261	±	0.468976	1.47934	±	0.39598	1.85832	±	0.380319	1.6695	±	0.446691	1.67356	±	0.354587
	Valine-2TMS	85		0.118451	±	0.00734652	0.295207	±	0.0553411	0.488195	±	0.117002	0.217085	±	0.000363401	0.725669	±	0.221936	0.168075	±	0.0370981	0.201753	±	0.0173719	0.193189	±	0.00439371	0.210378	±	0.00552723	0.198061	±	0.0353131
	Xylose-4TMS(2)	86																							0.0846316	±	0.0179463				0.0532578	±	0.0115543
	Xylose-meto-4TMS	87																				0.0298501	±	0.00825938	0.140627	±	0.0246609	0.00870897	±	0.00234884	0.121318	±	0.0345614
	Xylulose-meto-4TMS	88																							0.0926481	±	0.0118283				0.0795396	±	0.0364179
Numbers before trimethylsilyl (TMS) indicate number of TMS groups of metabolite derivatives.
